# Supplementary material for: Preclinical Proof-of-Concept, Analytical Development, and Commercial Scale Production of Lentiviral Vector in Adherent Cells
Source: PubMed Central journal article supplement — Mol Ther Methods Clin Dev. 2019 Aug 29;15:63–71. doi: 10.1016/j.omtm.2019.08.006 (PMC6804948; doi:10.1016/j.omtm.2019.08.006), 2019-08-29
Supplement: mmc1.pdf [file mmc1.pdf]

**OMTM, Volume 15**

## **Supplemental Information**

### **Preclinical Proof-of-Concept, Analytical Development, and Commercial Scale Production of Lentiviral Vector in Adherent Cells**

**Hanna M. Leinonen, Eevi M. Lipponen, Anniina J. Valkama, Heidi Hynynen, Igor Oruetxebarria, Vesa Turkki, Venla Olsson, Jere Kurkipuro, Haritha Samaranayake, Ann-Marie Määttä, Nigel R. Parker, Seppo Ylä-Herttuala, and Hanna P. Lesch**

# Supplemental data

## Supplemental figures and legends

Figure S1. Glucose and lactate concentrations in iCELLis Nano and iCELLis 500 runs.

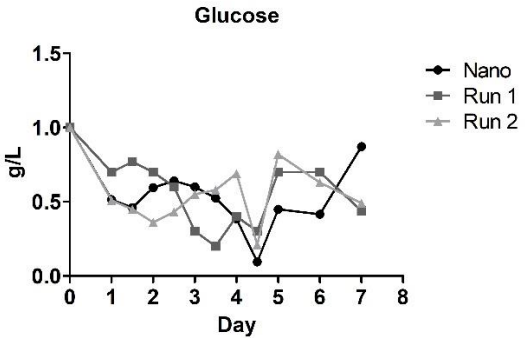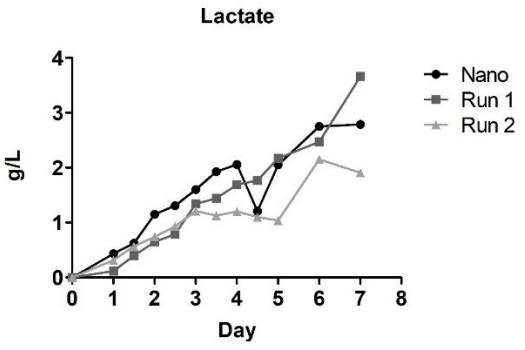

Figure S2. Tumor implantation coordinates.

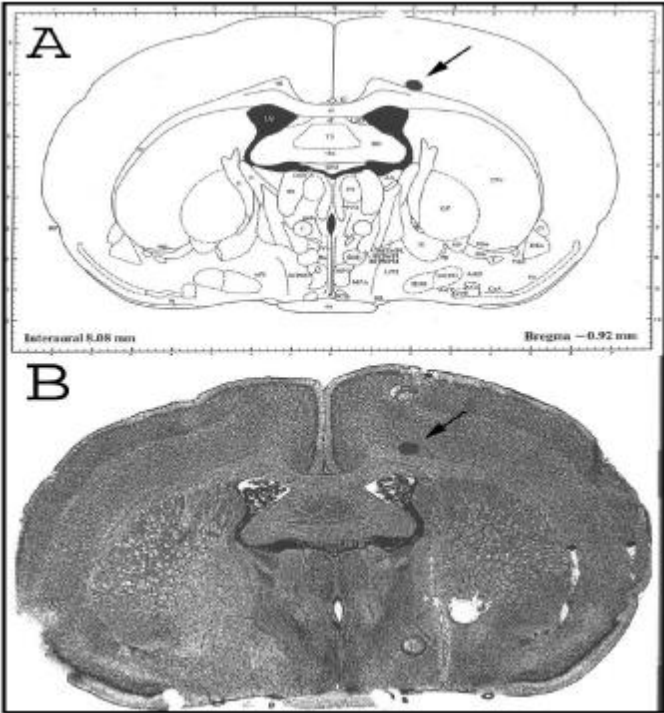

**Table S1. Variations in potency assay.** The effect of GCV on LV-TK transduced cells shown as average ICE50 values, Sd and CV% of all tests (inter assay), individual assays (intra assay) and operators, and average and sd of ICE50 intra assay and between operators of. One assay contains four separate plates, n=3 per plate.

|                    |         | <b>Average<br/>ICE 50<br/>(MOI)</b> | <b>Sd</b> | <b>CV%</b> |
|--------------------|---------|-------------------------------------|-----------|------------|
| <b>Inter assay</b> |         | 0.06                                | 0.04      | 67.71      |
| <b>Intra assay</b> | Assay 1 | 0.03                                | 0.02      | 65.01      |
|                    | Assay 2 | 0.07                                | 0.03      | 37.48      |
|                    | Assay 3 | 0.1                                 | 0.03      | 32.20      |
|                    | Assay 4 | 0.03                                | 0.01      | 51.54      |
| <b>Operator</b>    | 1       | 0.09                                | 0.03      | 36.85      |
|                    | 2       | 0.03                                | 0.01      | 51.53568   |
|                    | 3       | 0.03                                | 0.02      | 65.00752   |
